# Supplementary material for: Characterization of Microstructures and Tensile Properties of Recycled Al-Si-Cu-Fe-Mn Alloys with Individual and Combined Addition of Titanium and Cerium
Source: Scanning. 2018 Dec 17;2018:3472743. doi: 10.1155/2018/3472743 (PMC6311731; doi:10.1155/2018/3472743)
Supplement: Supplementary Materials [file 3472743.f1.zip]

Archive with 5 entries (4 files):
- Optional Supplementary Materials/Dimension distribution of secondary phases.rar
- Optional Supplementary Materials/Tensile properties and Matlab drawing.rar
- Optional Supplementary Materials/í╛1í┐Image improvement.m
- Optional Supplementary Materials/í╛2í┐Statistical Analysis.m
- Optional Supplementary Materials/
