# Supplementary material for: Characterization of Microstructures and Tensile Properties of Recycled Al-Si-Cu-Fe-Mn Alloys with Individual and Combined Addition of Titanium and Cerium
Source: Scanning. 2018 Dec 17;2018:3472743. doi: 10.1155/2018/3472743 (PMC6311731; doi:10.1155/2018/3472743)
Supplement: Supplementary Materials [file 3472743.f1.zip › Optional Supplementary Materials/í╛1í┐Image improvement.m]

%%
% ¹¤×÷Ä¿Â¼£º

%¿ÅÁ£Ô²¶È
clear;close all;clc;
area=100;  %Éè¶¨Í¼ÖÐÊÓÎªÔëµãµÄºÚµã
%%
%¶ÁÈ¡Ô´Í¼Ïñ
I = imread('TTT.jpg');
figure;imshow(I);
%%
%»Ò¶È»¯¡¢È¡·´
Mm=size(size(I));
if Mm(2)==3;  %ÅÐ¶¨¾ØÕóÎ¬¶È
    h = rgb2gray(I);
else
    h=I;
end

figure;imshow(h);%»Ò¶ÈÍ¼Ïñ
% h = imcomplement(h);%È¡·´
figure;imshow(h,'border','tight','initialmagnification','fit');
% set (gcf,'Position',[0,0,1550,2088]);

%%
%ÖÐÖµÂË²¨¡¢¶þÖµ»¯
h = medfilt2(h,[2,2]); %ÖÐÖµÂË²¨£¬[]ÄÚÄ¬ÈÏ3£¬3
bw = im2bw(h,graythresh(h));
%%
%Ïû³ýÔëµã
se = strel('disk',2);
bw = imclose(bw,se);
figure;imshow(bw,'border','tight','initialmagnification','fit');
set (gcf,'Position',[0,0,1550,2088]);
%% Í³¼ÆÍ¼ÐÎÐÅÏ¢£¬L±íÊ¾bwlabelºóµÄ±ê¼Ç¾ØÕó £¬M±íÊ¾·Ç0±ÕºÏÇøÓòÊýÄ¿£»
[L,M]=bwlabel(bw);
stats=regionprops(bw);
% 
% %% ¶Ôstats½øÐÐ·ÖÎö,ÂÔÈ¥Ð¡ÓÚareaµÄÔëÒôµã
% LS=size(stats);
% s0=1;
% for s=1:LS(1)
%     A(s)=stats(s).Area; 
%     if A(s)<=area
%         Ar(s0)=s;
%         s0=s0+1
%     end
% end
% LR=size(Ar);
% for r=1:LR(2)
%     for j1=1:1550
%         for k1=1:2088
%             if L(j1,k1)==Ar(r);
%                 L(j1,k1)=0;
%             end
%         end
%     end
%     
% end
% 
% 
% %% ¶ÔÇøÓò½øÐÐpcolorÎ±²ÊÍ¼äÖÈ¾
% figure;
% for j=1:1550 
%     for k=1:2088
%         if L(j,k)~=0&&(L(j,k)<100||L(j,k)>255)
%             L(j,k)=100+155*rand(1,1);  %±ÜÃâ¾ØÕóÔÚ<100ºÍ>255µÄÉ«Æ×³öÏÖµ¼ÖÂÍ¼ÏñÎÞ·¨±æ±ð
%         end
%     end
% end
%  V=pcolor(L);%×÷Î±²ÊÍ¼
%     set(V,'linestyle','none');%È¥Íø¸ñ
%     
% %% Í¼ÏñÊä³ö
% rr=1;
% RR=L;
% for p1=1:1550
%     for p2=1:2088
%         if L(p1,p2)~=0
%             L(p1,p2)=1;
%             RR(p1,p2)=0.5;% ¼ÇÂ¼±ßÔµµÄÎ»ÖÃµã£¬·½±ã·´Ãè»æ£»
%         end
%     end
% end
% 
% LL=1-L; %Éè¶¨»ùÌåÑÕÉ«Îª°×É«·½±ãÊ¹ÓÃregionpropsÁ¬Í¨ÇøÓòÊ¶±ð
% [L2,M2]=bwlabel(LL);
% stats2=regionprops(LL);
% MX=find(stats2.Area==max(stats2.Area));%»ùÌåµÄÌØÕ÷¾ÍÊÇÁ¬Í¨ÇøÓò¿Õ¼ä×î´ó£»
% for p1=1:1550
%     for p2=1:2088
%         if L2(p1,p2)==1
%             L2(p1,p2)=0;
%         end
%     end
% end
% W=abs(1-L2);
% WW=W+RR*100;
% figure
% J=pcolor(WW);
% set(J,'linestyle','none');%È¥Íø¸ñ
% f=getframe(gcf);
% mkdir image;
% imwrite(f.cdata,'[J].jpg')
%     %% ¶þÖµÍ¼Êä³ö
%  U=W;
%     for k1=1:1550
%     for k2=1:2088
%         if U(k1,k2)~=1
%             U(k1,k2)=0;
%         end
%     end
%     end
% B=(U+RR)./1.5;
%     figure
%     imshow (B);
%  imwrite(B, '[B].jpg');
%     imshow(U);
 imwrite(bw, '[U].jpg');

    
