# Supplementary material for: Characterization of Microstructures and Tensile Properties of Recycled Al-Si-Cu-Fe-Mn Alloys with Individual and Combined Addition of Titanium and Cerium
Source: Scanning. 2018 Dec 17;2018:3472743. doi: 10.1155/2018/3472743 (PMC6311731; doi:10.1155/2018/3472743)
Supplement: Supplementary Materials [file 3472743.f1.zip › Optional Supplementary Materials/í╛2í┐Statistical Analysis.m]

clc;clear;close all;

%[FileName,PathName] = uigetfile('*.*','Select the image');  
Im=imread('[U].jpg');
Im=im2bw(Im);
imshow(Im)
hold on
L = size(Im);
height=310;
width=261;
max_row = floor(L(1)/height);%ÊµÑéÍ¼Æ¬Îª1550*2088£¬Ôòmax_row=5,max_col=8
max_col = floor(L(2)/width);
seg=cell(max_row,max_col);%Éú³É5*8¸ñÊ½Ôª°û

%% ÉèÖÃÑ­»·
% Ã¿¸öÑ­»·µÄÐÐ£ºIm¾ØÕóµÄ£º¡¾£¨row-1£©*h+1¡¿£º¡¾row*h¡¿
% Ã¿¸öÑ­»·µÄÁÐ£ºÔ­ÀíÍ¬ÉÏ
for row=1:max_row
    for col=1:max_col
        seg(row,col)={Im((row-1)*height+1:row*height,(col-1)*width+1:col*width,:)};
    end
end
for i=1:max_row*max_col
    
imwrite(seg{i},strcat('m',int2str(i),'.bmp'));   %°ÑµÚiÖ¡µÄÍ¼Æ¬Ð´Îª'mi.bmp'±£´æ
end
%»­³ö·Ö¿éµÄ±ß½ç
for row = 1:max_row      
    for col = 1:max_col  
 rectangle('Position',[width*(col-1),height*(row-1),width,height],...
         'LineWidth',2,'LineStyle','-','EdgeColor','r');
        end
end 
hold off

%% Ã¿¸öÐ¡¿éÇøÓòÍ³¼Æ
EQ=75;  %µÈÐ§Á£¾¶ £¨um£©
for i0=1:i
    seg2{i0}=1-seg{i0};
    seg3{i0}=bwlabel(seg2{i0});  %Ò»¶¨Ò»¶¨Òª½øÐÐÁªÍ¨Çø±ê¼Ç
    s_stats{i0}=regionprops(seg3{i0});
    S_area(i0)=sum([s_stats{i0}(1:end).Area]);  %Ã¿¸ö·Ö¿éÐ¡ÇøÓòµÄÁ¬Í¨¿ÅÁ£ÇøÇóºÍ
end
P_Num=S_area./(pi*(EQ/2)^2);  %Ã¿¸öÐ¡ÇøÓòÄÚ¿ÅÁ£µÄÊµ¼ÊÊýÁ¿£»
AV_Num=sum(P_Num)/i;  %Ã¿¸öÐ¡ÇøÓòÄÚ¿ÅÁ£Æ½¾ùÊýÁ¿£»

S_rel=sqrt(1/(i-1)*sum((P_Num-AV_Num).^2))
SB=sqrt(1/i*sum((P_Num-AV_Num).^2));
BY=SB/AV_Num
